# Supplementary material for: Ce K edge XAS of ceria-based redox materials under realistic conditions for the two-step solar thermochemical dissociation of water and/or CO2
Source: Royal Society of Chemistry journal article supplement (doi:10.1039/c5cp03179f), 2015-01-01
Supplement: c5cp03179f1.pdf [file c5cp03179f1.pdf]

1 Supporting Information: Ce K edge XAS of  
2 ceria-based redox materials under realistic  
3 conditions for the two-step solar thermochemical  
4 dissociation of water and/or CO<sub>2</sub>

5 Matthäus Rothensteiner<sup>\*§</sup> Simone Sala<sup>\*</sup> Alexander Bonk<sup>†</sup>  
6 Ulrich Vogt<sup>†</sup> Hermann Emerich<sup>‡</sup> Jeroen A. van Bokhoven<sup>\*§</sup>

7 September 17, 2015

---

<sup>\*</sup>Paul Scherrer Institut 5232 Villigen PSI, Switzerland

<sup>†</sup>EMPA Überlandstrasse 129 CH-8600 Dübendorf, Switzerland

<sup>‡</sup>ESRF, 71 Avenue des Martyrs, 38000 Grenoble, France

<sup>§</sup>Institute for Chemical and Bioengineering ETH Zürich, Vladimir-Prelog-Weg 2, 8093 Zürich, Switzerland  
E-mail: [jeroen.vanbokhoven@chem.ethz.ch](mailto:jeroen.vanbokhoven@chem.ethz.ch)

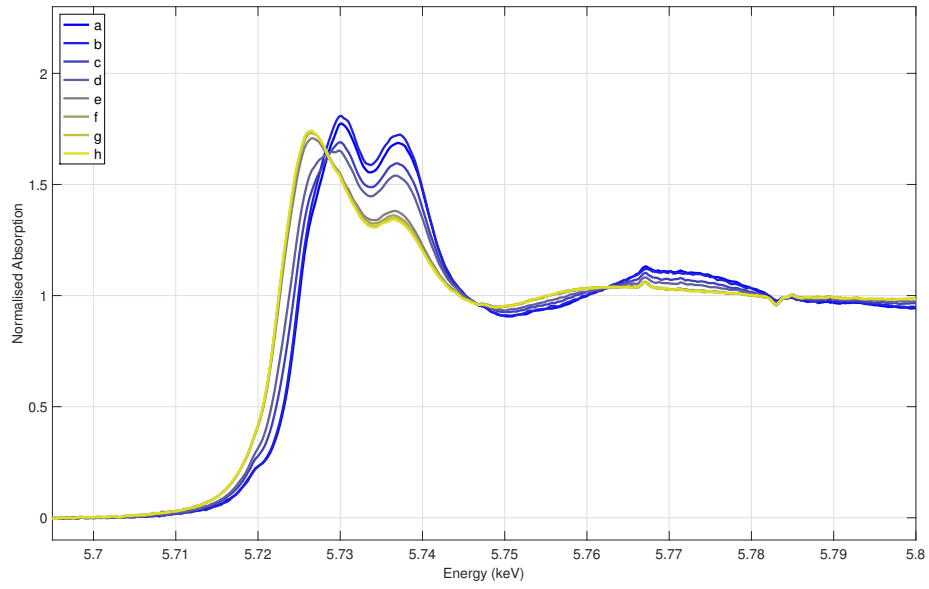

Figure 1: Normalised Ce  $L_{III}$  edge absorption spectra recorded during reduction of  $\text{Ce}_{0.9}\text{Hf}_{0.1}\text{O}_{2-\delta}$  powder diluted with BN by heating with a rate of  $50 \text{ Kmin}^{-1}$  from RT (a) to 1073 K (f,g,h) in a flow of helium. Kapton windows were used.

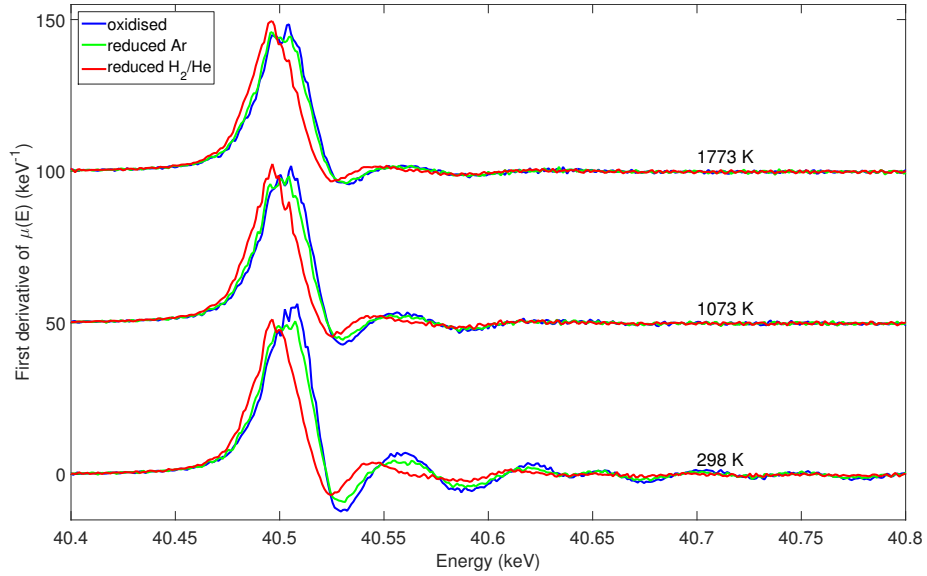

(a)

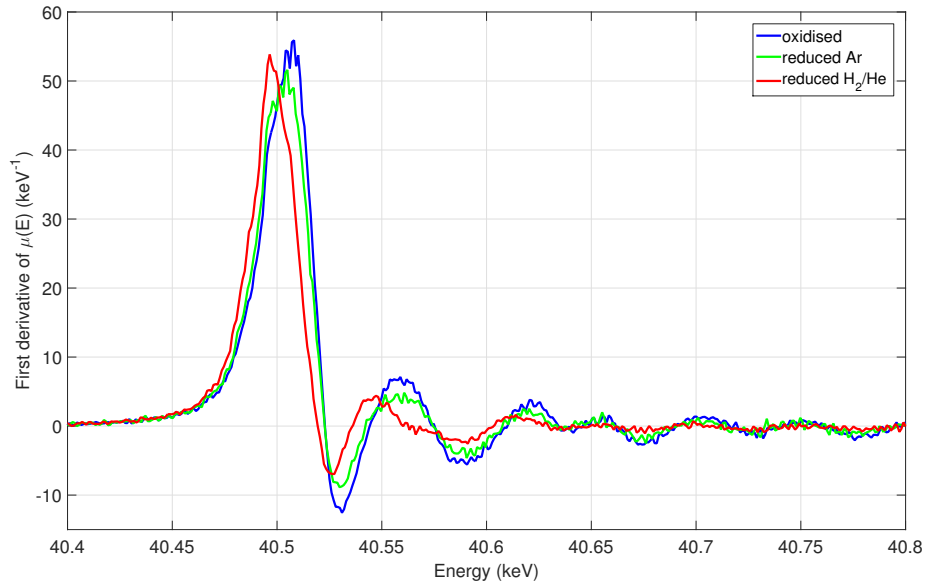

(b)

Figure 2: a) First derivative of cerium K edge spectra of  $\text{Ce}_{0.9}\text{Hf}_{0.1}\text{O}_{2-\delta}$ , recorded at 298, 1073, and 1773 K. 'Oxidised' (298 K) is the spectrum of the as-prepared pellet after introduction into the XAS cell. 'Oxidised' (1073) and 'oxidised' (1773) were recorded after oxidation in 1 atm  $\text{CO}_2$ . 'Reduced Ar' denotes spectra recorded after reducing the sample in a flow of argon at 1773 K and 'reduced  $\text{H}_2/\text{He}$ ' spectra recorded after reducing the sample in a flow of 2% hydrogen/helium at 1773 K. b) Close-up of spectra recorded at 298 K. 'Oxidised' denotes the spectrum of the as-prepared pellet after introduction into the XAS cell. 'Reduced Ar' denotes spectra recorded after reducing the sample in a flow of argon at 1773 K and 'reduced  $\text{H}_2$ ' spectra recorded after reduction in a flow of 2% hydrogen/helium at 1773 K.

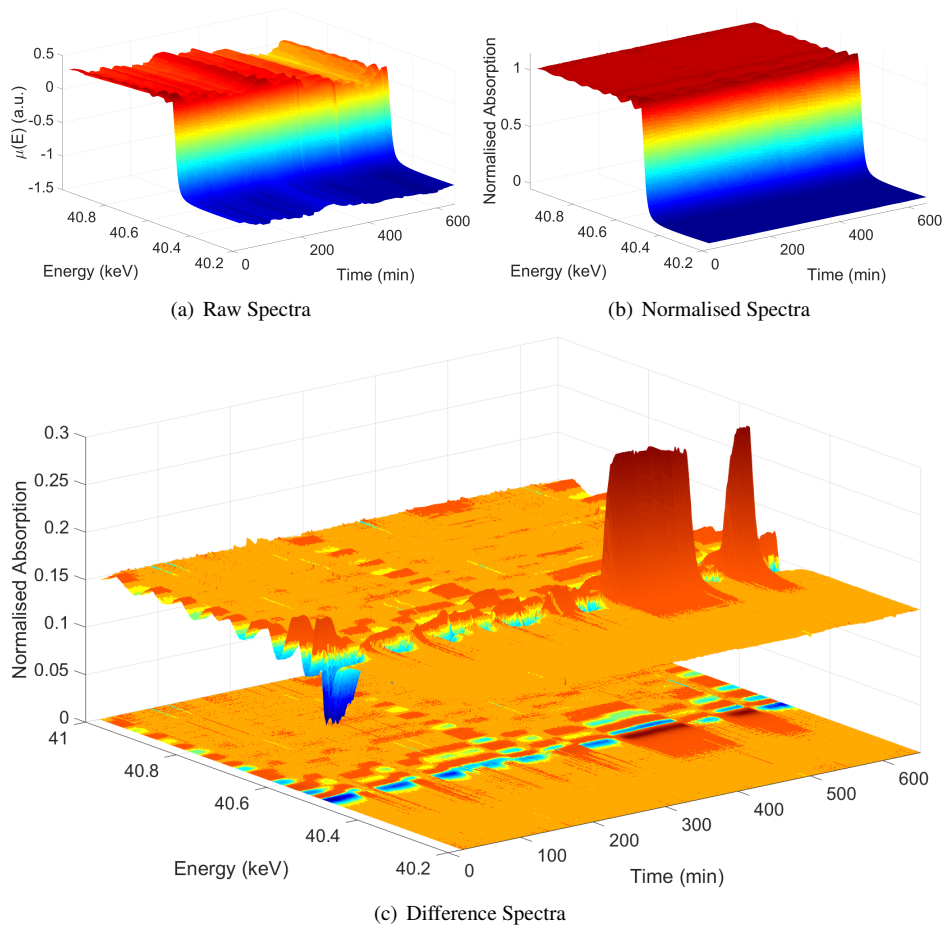

Figure 3: (a) Cerium K edge X-ray absorption spectra, (b) after normalization and (c) difference spectra obtained by subtraction of a spectrum recorded at 1073 K after the first reduction by flushing the reactor with argon at 1773 K.

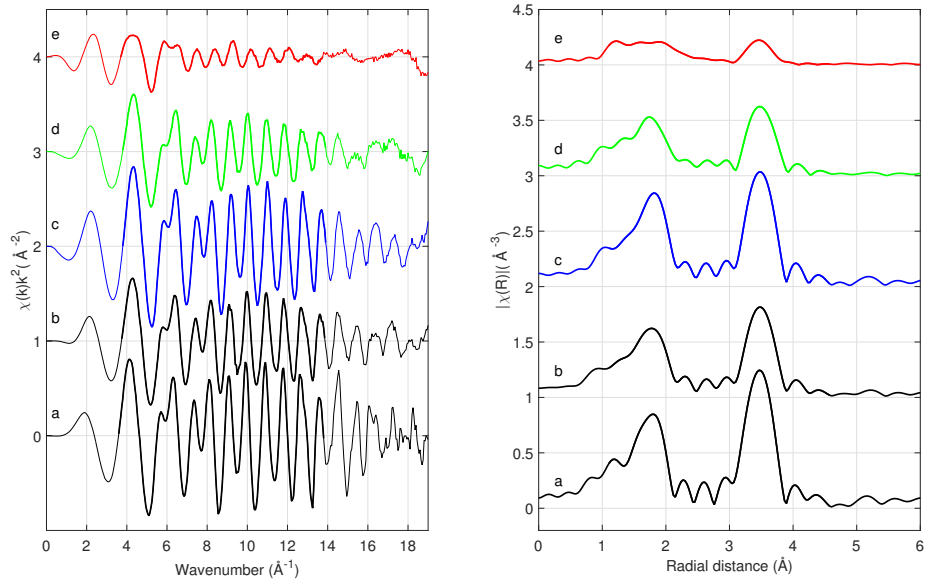

Figure 4: Extended X-ray absorption fine structure (EXAFS) of a) CeO<sub>2</sub> (as prepared) b) CeO<sub>1.93</sub> (reduced Ar) c) Ce<sub>0.9</sub>Hf<sub>0.1</sub>O<sub>2</sub> (as prepared) d) Ce<sub>0.9</sub>Hf<sub>0.1</sub>O<sub>1.92</sub> and e) Ce<sub>0.9</sub>Hf<sub>0.1</sub>O<sub>1.55</sub> (reduced H<sub>2</sub>) recorded at RT. The bold lines indicate the data range used for Fourier-transformation of  $\chi(k)$  to obtain the pseudo-radial distribution functions  $\chi(R)$ .

## 8 1 Energy resolution

9 At 40 keV, the intrinsic energy resolution of parallel beams reflected on a Si (111)  
 10 monochromator crystal oriented orthogonally to the polarization plane reported by  
 11 Sanchez del Rio and Mathon<sup>1</sup> is  $\Delta E = 0.135 \cdot 40 = 5.4$  eV. The angular range over  
 12 which total reflection occurs is described by the Darwin width  $\omega_D$  of the crystal by the  
 13 dynamical theory of diffraction. The Darwin width is defined as the full width-at-half-  
 14 maximum of the reflex of a divergent beam.

$$\omega_D = \frac{2\lambda^2 r_e C \sqrt{|\gamma|} |F_{hkl}|}{\pi V \sin 2\theta_B} \quad (1)$$

15  $\lambda$  is the photon wavelength,  $r_e$  the classical electron radius, C the polarization factor,  
 16  $\gamma$  the asymmetric ratio, V the volume of the crystal unit cell, and  $|F_{hkl}|$  the structure  
 17 factor for the selected crystal reflection. For a polarized beam and symmetric Bragg  
 18 reflection, C and  $\gamma$  are equal to 1.

19 For Cu  $K_\alpha$  radiation with  $\lambda = 1.54 \text{ \AA}$ ,  $\theta_B = 14.22^\circ$ ,  $\omega_{D,Cu} = 3.4 \cdot 10^{-5}$  rad. At high  
 20 photon energies, the structure factor  $|F_{111}|$  can be considered as weakly energy depen-  
 21 dent, which extrapolates for  $\omega_{D,40}$  to:

$$\omega_{D,40} = \omega_{D,Cu} \cdot \frac{\lambda_{40}^2 \sin 2\theta_{B,Cu}}{\lambda_{Cu}^2 \sin 2\theta_{B,40}} = 6.6 \cdot 10^{-6} \text{ rad} \quad (2)$$

22 A beam with 0.5 mm high at the sample position located 40 m from the source  
 23 leads to a divergence  $\psi = \frac{0.375 \text{ mm}}{30 \text{ m}} = 1.25 \cdot 10^{-5}$  rad at the monochromator, which is  
 24 located 30 meters away from the source. In the present case, the divergence  $\psi$  is thus  
 25 about two times as large as the Darwin width.

26 Considering the intrinsic resolution of the crystal a constant  $\Delta E$  can be calculated  
 27 from equation 3:  $R_T$  is a measure for the efficiency of the reflection on two crystals and  
 28 defined as  $R_T = R_1 R_2 p_0$ , the product the ratios of the source and reflected bandwidths  
 29  $R_1$  and  $R_1$  and a coefficient  $p_0$  describing the peak value of the rocking curve.

$$R_T = 1 \cdot \left( \frac{\Delta E}{E} \right)_{intr} \cdot 10^3 \quad (3)$$

30 According to Table 1 in the work of Sanchez del Rio and Mathon<sup>1</sup> even at  $\psi = 5\omega_D$   
31 the value for  $R_T$  changes by less than 2%.  
32  $\Delta E_1 = E \cdot R_T \cdot 10^{-3} = 40 \cdot 1346 \cdot 10^{-7} = 5.38 \text{ eV}$   
33  $\Delta E_{\psi=5\omega_D} = E \cdot R_T \cdot 10^{-3} = 40 \cdot 1373 \cdot 10^{-7} = 5.49 \text{ eV}$   
34 We can therefore conclude that at 40 keV the energy resolution  $\Delta E$  of the Si (111)  
35 double crystal monochromator with flat crystals is better or equal to 6.0 eV.

## 36 References

37 [1] M. Sanchez del Rio and O. Mathon, *Adv. Comput. methods x-ray neutron Opt.*,  
38 2004, **5536**, 157–164.
